# Supplementary material for: Efficacy of typhoid conjugate vaccine in Nepal: final results of a phase 3, randomised, controlled trial
Source: PubMed Central journal article supplement (PMC8551681; doi:10.1016/s2214-109x(21)00346-6), 2021-10-19
Supplement: mmc1.pdf [file mmc1.pdf]

# THE LANCET

## Global Health

### Supplementary appendix

This appendix formed part of the original submission and has been peer reviewed.  
We post it as supplied by the authors.

Supplement to: Shakya M, Voysey M, Theiss-Nyland K, et al. Efficacy of typhoid conjugate vaccine in Nepal: final results of a phase 3, randomised, controlled trial. *Lancet Glob Health* 2021; **9**: e1561–68.

# Supplementary Appendix

## Contents

|     |                                                                                                                                                 |    |
|-----|-------------------------------------------------------------------------------------------------------------------------------------------------|----|
| 1.0 | Sample size calculation .....                                                                                                                   | 2  |
| 2.0 | Inclusion and exclusion criteria .....                                                                                                          | 3  |
| 2.0 | Supplementary Tables and Figures .....                                                                                                          | 4  |
|     | Figure S1. Trial flow diagram .....                                                                                                             | 4  |
|     | Figure S2. Boxplot of Anti-Vi IgA Response at Different Timepoints According to Age<br>Category .....                                           | 5  |
|     | Figure S3. Boxplot of Anti-Vi IgA Response at Different Timepoints According to Age<br>Category .....                                           | 6  |
|     | Table S1. Anti-Vi IgA and IgG Levels at Baseline, 28 Days and 18 Months after<br>Randomization in the Immunogenicity Cohort, by Age Group ..... | 7  |
|     | Table S2. Anti-Vi IgA and IgG Levels at Baseline, 28 Days, 18 Months after<br>Randomization in the Immunogenicity Cohort, by Sex .....          | 10 |
|     | Table S3. Fever Presentations and Protective Efficacy of Typhoid Conjugate Vaccine<br>(TCV) .....                                               | 14 |
|     | Table S4. Hospitalizations, Absenteeism and Protective Efficacy of Typhoid Conjugate<br>Vaccine (TCV) .....                                     | 16 |
|     | Table S5. Causes of Deaths in the Study Cohort .....                                                                                            | 18 |
|     | Table S6. Antibiotic susceptibility profile for <i>S. Typhi</i> isolates .....                                                                  | 19 |

## 1.0 Sample size calculation

Sample size calculations are based on the following assumptions:

1. An overall incidence of typhoid fever of 85 cases per 100,000 person-years in the entire population, with higher incidence rates in children under 16 years.
2. Age specific incidence rates were determined from the age distribution of typhoid cases in Kathmandu, from published estimates and from unpublished site-specific surveillance data.
3. A direct effect of vaccination of 75% and an indirect effect of 25% based on mathematical modelling.
4. 25% loss to follow-up per year due to moving out of the area, based on unpublished surveillance data from Lalitpur.

With the above assumptions, the calculated sample size was 17,395 children. To allow for further variation in the assumptions, the total sample size was increased to 20,000 children with 10,000 children in each vaccination arm.

## 2.0 Inclusion and exclusion criteria

### Inclusion Criteria

Participants had to fulfill all of the following criteria to be eligible for enrollment:

- Parents/ legal guardians was willing and competent to provide informed consent.  
Assent was also be sought for participants 7 years and older.
- Aged between 9 months and under-16 years at the time of the vaccination.
- In good health on the day of the vaccination.
- Parents/ legal guardians confirmed that their child would be willing and would be able to comply with the study requirement including follow-up contact.
- Lived within the study catchment area at the time of vaccination.

### Exclusion Criteria

Participants were not enrolled if any of the following criteria applied:

- Participant had knowingly received a typhoid vaccine in the last three years.
- Participant had a known allergy to any of the vaccine components.
- Participant or the parent/legal guardian had any medical or social reasons preventing them from conforming to the study requirements as judged by a medical professional.
- Participant or the parent/legal guardian were planning to move away from the catchment area with the next six months.

### 3.0 Supplementary Figures and Tables

**Figure S1. Trial flow diagram**

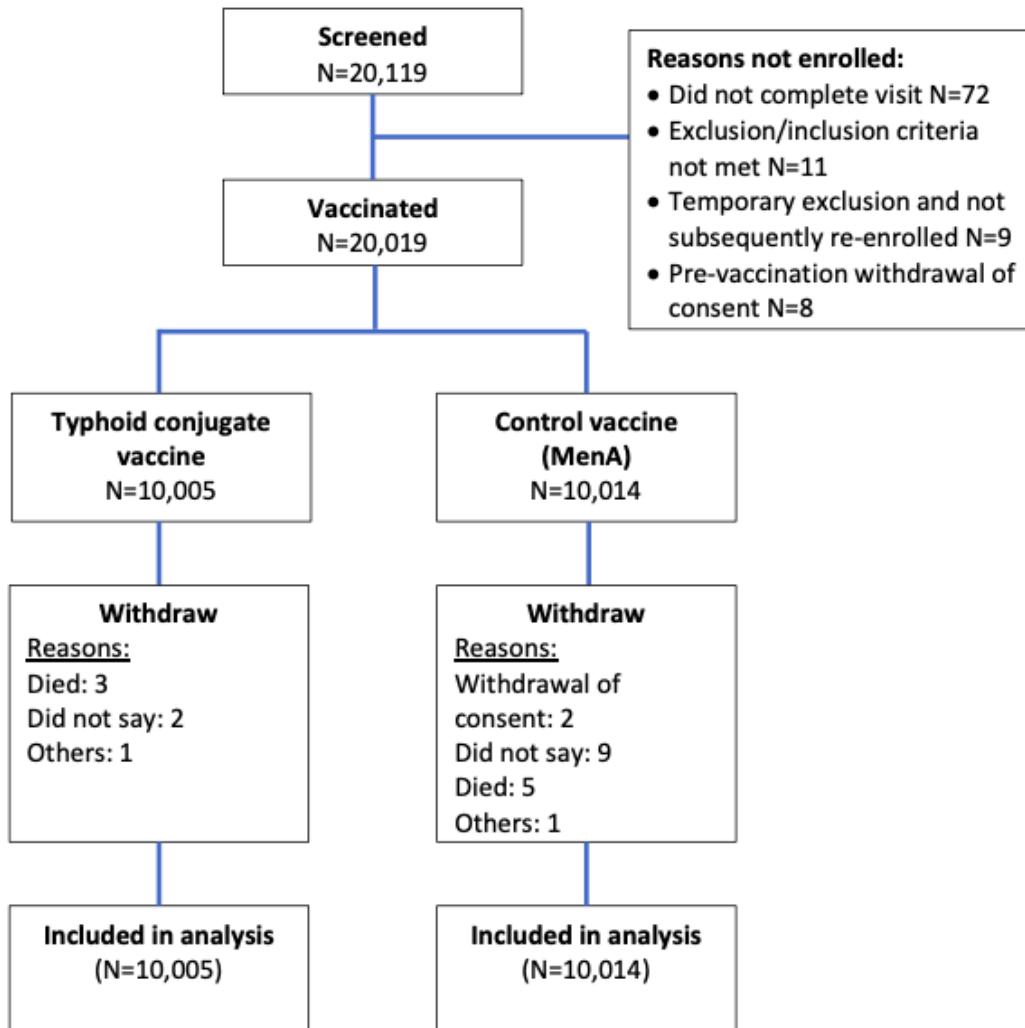

**Figure S2. Boxplot of Anti-Vi IgA Response at Different Timepoints According to Age Category.**

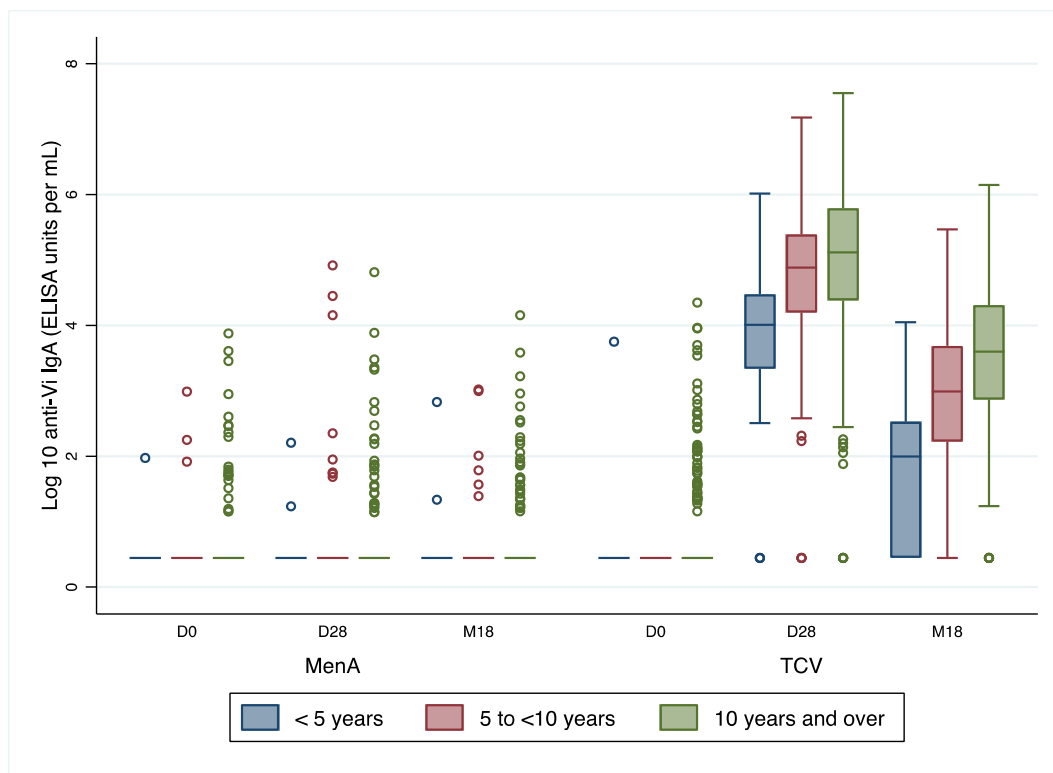

TCV = Typhoid conjugate vaccine. Men A = Group A meningococcal vaccine

**Figure S3. Boxplot of Anti-Vi IgG Response at Different Timepoints According to Age Category**

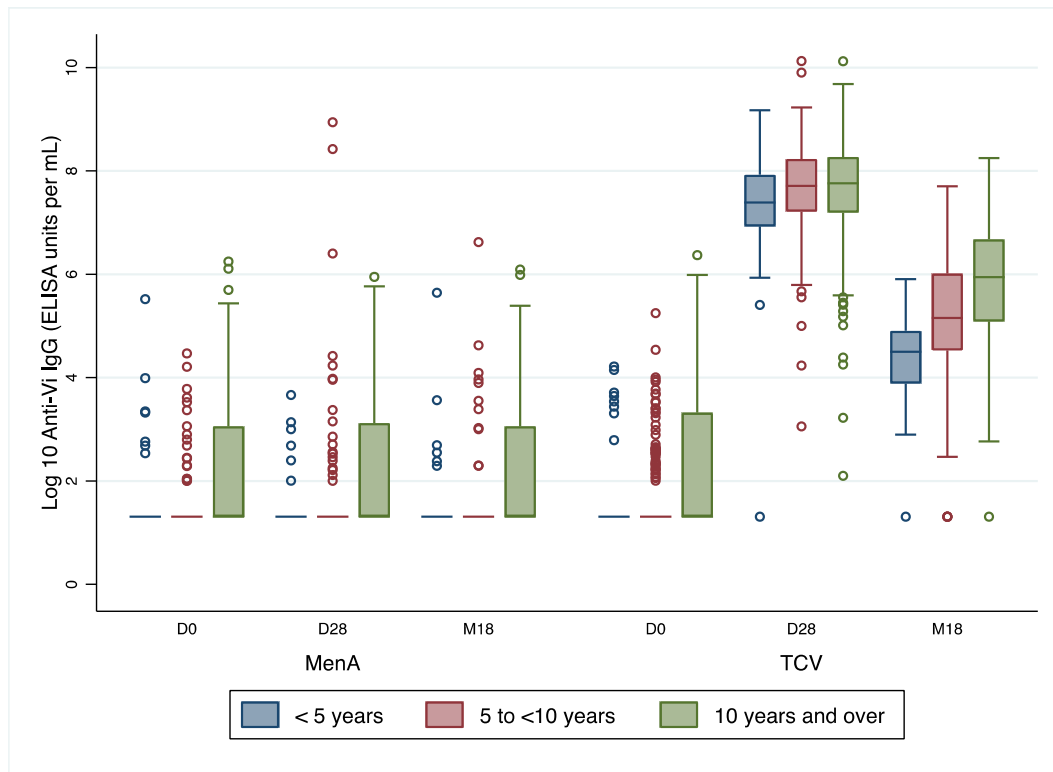

TCV = Typhoid conjugate vaccine. Men A = Group A meningococcal vaccine

**Table S1. Anti-Vi IgA and IgG Levels at Baseline, 28 Days, and 18 Months after Randomization in the Immunogenicity Cohort, by Age**

**Group**

| Trial Group                                                                                  | Day 0             | Day 28              | Month 18          | Period from Day 0 – Day 28        | Period from Day 0 – Month 18   | Day 0            | Day 28                | Month 18            | Period from Day 0 – Day 28          | Period from Day 0 – Month 18      | Day 0              | Day 28                 | Month 18            | Period from Day 0 – Day 28           | Period from Day 0 – Month 18      | P-value†                                                                  |
|----------------------------------------------------------------------------------------------|-------------------|---------------------|-------------------|-----------------------------------|--------------------------------|------------------|-----------------------|---------------------|-------------------------------------|-----------------------------------|--------------------|------------------------|---------------------|--------------------------------------|-----------------------------------|---------------------------------------------------------------------------|
| Age Category                                                                                 | Less than 5 years |                     |                   |                                   |                                | 5 – <10 years    |                       |                     |                                     |                                   | 10 years and above |                        |                     |                                      |                                   |                                                                           |
|                                                                                              |                   |                     |                   | <b>4-fold rise</b>                | <b>4-fold rise</b>             |                  |                       |                     | <b>4-fold rise</b>                  | <b>4-fold rise</b>                |                    |                        |                     | <b>4-fold rise</b>                   | <b>4-fold rise</b>                |                                                                           |
| <b>Anti-Vi IgA Level</b>                                                                     |                   |                     |                   |                                   |                                |                  |                       |                     |                                     |                                   |                    |                        |                     |                                      |                                   |                                                                           |
| <b>TCV</b>                                                                                   |                   |                     |                   |                                   |                                |                  |                       |                     |                                     |                                   |                    |                        |                     |                                      |                                   |                                                                           |
| Level above lower limit of quantification of the assay – no. of participants/ total no. (%)* | 1/55 (1.82)       | 52/55 (94.55)       | 56/76 (73.68)     | 52/55 (94.55)                     | 25/42 (59.52)                  | 0/225 (0.00)     | 221/225 (98.22)       | 209/220 (95.00)     | 221/225 (98.22)                     | 160/182 (87.91)                   | 55/403 (13.65)     | 397/403 (98.51)        | 336/343 (97.96)     | 391/403 (97.02)                      | 294/315 (93.33)                   |                                                                           |
| Geometric mean concentration (95% CI) – EU/ml                                                | 1.66 (1.47–1.89)  | 46.77 (34.54–63.33) | 6.02 (4.83–7.51)  | 47.44 (34.38–60.50) fold increase | 6.22 (4.30–8.13) fold increase | 1.56 (1.56–1.56) | 112.0 (97.19–129.08)  | 18.20 (15.81–20.95) | 110.84 (97.17–124.51) fold increase | 21.04 (17.55–24.55) fold increase | 1.96 (1.84–2.09)   | 145.92 (130.45–163.23) | 35.56 (31.67–39.93) | 135.43 (121.35–149.51) fold increase | 34.07 (29.58–38.55) fold increase | D0<0.001<br>D28<0.001<br>M18<0.001<br><br>D0-D28 < 0.001<br>D0-M18 <0.001 |
| Median (IQR)                                                                                 | 1.56 (1.56–1.56)  | 55.17 (28.11–87.87) | 7.35 (1.56–12.52) |                                   |                                | 1.56 (1.56–1.56) | 132.08 (66.34–219.73) | 19.89 (9.25–39.92)  |                                     |                                   | 1.56 (1.56–1.56)   | 166.87 (80.07–327.66)  | 36.58 (17.57–74.60) |                                      |                                   |                                                                           |
| <b>MenA vaccine</b>                                                                          |                   |                     |                   |                                   |                                |                  |                       |                     |                                     |                                   |                    |                        |                     |                                      |                                   |                                                                           |
| Level above lower limit of quantification                                                    | 1/46 (2.17)       | 2/46 (4.35)         | 2/57              | 0/46 (0.00)                       | 1/35 (2.86)                    | 3/116 (2.59)     | 8/116 (6.90)          | 6/110 (5.45)        | 3/116 (2.59)                        | 2/93 (2.15)                       | 21/218 (9.63)      | 28/218 (12.84)         | 33/191 (17.28)      | 3/218 (1.38)                         | 3/171 (1.75)                      |                                                                           |



|                                                                                                                    |                          |                                               |                              |                                                    |                                                 |                          |                                      |                                |                                                    |                                                 |                            |                                      |                                |                                                    |                                                 |                                                                                      |
|--------------------------------------------------------------------------------------------------------------------|--------------------------|-----------------------------------------------|------------------------------|----------------------------------------------------|-------------------------------------------------|--------------------------|--------------------------------------|--------------------------------|----------------------------------------------------|-------------------------------------------------|----------------------------|--------------------------------------|--------------------------------|----------------------------------------------------|-------------------------------------------------|--------------------------------------------------------------------------------------|
| of the assay<br>– no. of<br>participants/<br>total no. (%)*                                                        | (3.51)                   |                                               |                              |                                                    |                                                 |                          |                                      |                                |                                                    |                                                 |                            |                                      |                                |                                                    |                                                 |                                                                                      |
| Geometric<br>mean<br>concentration<br>(95% CI) –<br>EU/ml                                                          | 1.61<br>(1.51 –<br>1.72) | 1.65<br>(1.51 –<br>1.79)                      | 1.65<br>(1.51 –<br>1.81)     | 1.03<br>(0.98 –<br>1.09)<br>fold<br>increase       | 1.32<br>(0.75-<br>1.90)<br>fold<br>increase     | 1.64<br>(1.55 –<br>1.74) | 1.84<br>(1.62 –<br>2.10)             | 1.70<br>(1.58 –<br>1.85)       | 2.59<br>(0.73 –<br>4.45)<br>fold<br>increase       | 1.26<br>(0.90-<br>1.62)<br>fold<br>increase     | 1.83<br>(1.70 –<br>1.97)   | 1.93<br>(1.77 –<br>2.11)             | 2.02<br>(1.84 –<br>2.21)       | 1.52<br>(0.79 –<br>2.25)<br>fold<br>increase       | 1.25<br>(1.08 –<br>1.44)<br>fold<br>increase    | D0=0.0225<br>D28=0.1002<br>M18=0.0012<br><br>D0-D28<br>=0.8942<br>D0-M18<br>=0.1865  |
| Median (IQR)                                                                                                       | 1.56<br>(1.56 –<br>1.56) | 1.56<br>(1.56 –<br>1.56)                      | 1.56<br>(1.56 –<br>1.56)     |                                                    |                                                 | 1.56<br>(1.56 –<br>1.56) | 1.56<br>(1.56 –<br>1.56)             | 1.56<br>(1.56 –<br>1.56)       |                                                    |                                                 | 1.56<br>(1.56 –<br>1.56)   | 1.56<br>(1.56 –<br>1.56)             | 1.56<br>(1.56 –<br>1.56)       |                                                    |                                                 |                                                                                      |
| <b>Anti-Vi IgG<br/>Level</b>                                                                                       |                          |                                               |                              |                                                    |                                                 |                          |                                      |                                |                                                    |                                                 |                            |                                      |                                |                                                    |                                                 |                                                                                      |
| <b>TCV</b>                                                                                                         |                          |                                               |                              |                                                    |                                                 |                          |                                      |                                |                                                    |                                                 |                            |                                      |                                |                                                    |                                                 |                                                                                      |
| Level above<br>lower limit of<br>quantification<br>of the assay<br>– no. of<br>participants/<br>total no.<br>(%)** | 8/99<br>(8.08)           | 66/67<br>(98.51)                              | 75/76<br>(98.68)             | 54/55<br>(98.18)                                   | 55/58<br>(94.83)                                | 44/288<br>(15.28)        | 234/234<br>(100.00)                  | 216/220<br>(98.18)             | 225/225<br>(100.00)                                | 202/209<br>(96.65)                              | 216/46<br>2<br>(46.75)     | 408/408<br>(100.00)                  | 342/343<br>(99.71)             | 398/403<br>(98.76)                                 | 316/334<br>(94.61)                              |                                                                                      |
| Geometric<br>mean<br>concentration<br>(95% CI) –<br>EU/ml                                                          | 4.45<br>(3.92–<br>5.06)  | 1488.3<br>1<br>(1160.<br>83 -<br>1908.1<br>7) | 81.00<br>(67.23 –<br>97.58)  | 525.20<br>(403.81 –<br>646.58)<br>fold<br>increase | 28.65<br>(22.63 –<br>34.68)<br>fold<br>increase | 4.71<br>(4.38 –<br>5.08) | 2093.13<br>(1878.03<br>–<br>2332.87) | 182.29<br>(156.74 –<br>212.00) | 619.83<br>(556.98 –<br>682.67)<br>fold<br>increase | 69.39<br>(58.37 –<br>80.41)<br>fold<br>increase | 10.42<br>(9.26 –<br>11.70) | 2113.18<br>(1929.68<br>–<br>2314.18) | 367.87<br>(328.92 –<br>411.43) | 431.94<br>(382.09 –<br>481.79)<br>fold<br>increase | 72.87<br>(62.50 –<br>83.25)<br>fold<br>increase | D0 < 0.001<br>D28=0.0073<br>M18 < 0.001<br><br>D0-D28<br>< 0.001<br>D0-M18<br><0.001 |
| Median (IQR)                                                                                                       | 3.7<br>(3.7 –<br>3.7)    | 1619.3<br>7<br>(1018.<br>63 –<br>2766.0<br>8) | 89.95<br>(48.73 –<br>135.29) |                                                    |                                                 | 3.7<br>(3.7 –<br>3.7)    | 2227.37<br>(1353.86<br>–<br>3752.75) | 173.55<br>(92.34 –<br>408.76)  |                                                    |                                                 | 3.7<br>(3.7 –<br>27.72)    | 2342.88<br>(1327.70<br>–<br>3902.43) | 382.20<br>(161.97 –<br>793.64) |                                                    |                                                 |                                                                                      |

| MenA vaccine                                                                                  |                       |                       |                       |                                        |                                         |                       |                       |                       |                                           |                                        |                      |                        |                        |                                        |                                        |                                                                                        |
|-----------------------------------------------------------------------------------------------|-----------------------|-----------------------|-----------------------|----------------------------------------|-----------------------------------------|-----------------------|-----------------------|-----------------------|-------------------------------------------|----------------------------------------|----------------------|------------------------|------------------------|----------------------------------------|----------------------------------------|----------------------------------------------------------------------------------------|
| Level above lower limit of quantification of the assay – no. of participants/ total no. (%)** | 7/66<br>(10.61)       | 6/49<br>(12.24)       | 6/57<br>(10.53)       | 0/46<br>(0.00)                         | 1/47<br>(2.13)                          | 18/144<br>(12.50)     | 19/121<br>(15.70)     | 11/110<br>(10.00)     | 5/116<br>(4.31)                           | 3/98<br>(3.06)                         | 97/250<br>(38.80)    | 87/218<br>(39.91)      | 79/191<br>(41.36)      | 3/218<br>(1.38)                        | 6/186<br>(3.23)                        |                                                                                        |
| Geometric mean concentration (95% CI) – EU/ml                                                 | 4.64<br>(3.88 – 5.57) | 4.45<br>(3.82 – 5.19) | 4.51<br>(3.75 – 5.43) | 1.00<br>(0.90 – 1.10)<br>fold increase | 2.60<br>(-0.62 – 5.83)<br>fold increase | 4.50<br>(4.09 – 4.98) | 5.42<br>(4.37 – 6.71) | 4.70<br>(4.03 – 5.48) | 15.54<br>(-6.01 – 37.09)<br>fold increase | 1.64<br>(0.87 – 2.45)<br>fold increase | 8.73<br>(7.51-10.15) | 8.88<br>(7.54 – 10.47) | 8.90<br>(7.49 – 10.59) | 1.27<br>(0.91 – 1.64)<br>fold increase | 1.19<br>(0.93 – 1.45)<br>fold increase | D0 < 0.001<br>D28 < 0.001<br>M18 < 0.001<br><br>D0-D28=<br>0.0572<br>D0-M18=<br>0.1461 |
| Median (IQR)                                                                                  | 3.7<br>(3.7 – 3.7)    | 3.7<br>(3.7 – 3.7)    | 3.7<br>(3.7 – 3.7)    |                                        |                                         | 3.7<br>(3.7 – 3.7)    | 3.7<br>(3.7 – 3.7)    | 3.7<br>(3.7 – 3.7)    |                                           |                                        | 3.7<br>(3.7 – 22.68) | 3.7<br>(3.7 – 22.68)   | 3.7<br>(3.7 – 21.26)   |                                        |                                        |                                                                                        |

TCV = Typhoid conjugate vaccine. Men A = Group A meningococcal vaccine

† Kruskal-Wallis test

\*The lower limit of quantification was 3.125 EU per millilitre. Values below this limit were substituted with 1.56 EU per millilitre for the analysis.

\*\*The lower limit of quantification was 7.4 EU per millilitre. Values below this limit were substituted with 3.7 EU per millilitre for the analysis.

**Table S2. Anti-Vi IgA and IgG Levels at Baseline, 28 Days and 18 Months after Randomization in the Immunogenicity Cohort, by Sex**

| Trial Group                                                                                  | Male                  |                            |                          |                                           |                                        | Female                |                             |                          |                                           |                                        | P-value†                                                                     |
|----------------------------------------------------------------------------------------------|-----------------------|----------------------------|--------------------------|-------------------------------------------|----------------------------------------|-----------------------|-----------------------------|--------------------------|-------------------------------------------|----------------------------------------|------------------------------------------------------------------------------|
|                                                                                              | Day 0                 | Day 28                     | 18 months                | Period from Day 0 – Day 28                | Period from Day 0 – 18 months          | Day 0                 | Day 28                      | 18 months                | Period from Day 0 – Day 28                | Period from Day 0 – 18 months          |                                                                              |
| <b>Anti-Vi IgA Level</b>                                                                     |                       |                            |                          |                                           |                                        |                       |                             |                          |                                           |                                        |                                                                              |
| TCV                                                                                          |                       |                            |                          | <b>4-fold rise</b>                        | <b>4-fold rise</b>                     |                       |                             |                          | <b>4-fold rise</b>                        | <b>4-fold rise</b>                     |                                                                              |
| Level above lower limit of quantification of the assay – no. of participants/ total no. (%)* | 25/356<br>(7.02)      | 349/356<br>(98.03)         | 311/336<br>(92.56)       | 348/356<br>(97.75)                        | 242/277<br>(87.36)                     | 31/327<br>(9.48)      | 321/327<br>(98.17)          | 290/303<br>(95.71)       | 316/327<br>(96.64)                        | 237/262<br>(90.46)                     |                                                                              |
| Geometric mean concentration (95% CI) – EU/ml                                                | 1.73<br>(1.66 – 1.81) | 112.62<br>(99.72 – 127.19) | 19.70<br>(17.30 – 22.43) | 113.38<br>(101.27 – 124.49) fold increase | 25.20<br>(21.28 – 29.12) fold increase | 1.87<br>(1.74 – 1.99) | 133.18<br>(117.49 – 150.97) | 26.96<br>(23.56 – 30.86) | 127.72<br>(112.43 – 143.01) fold increase | 29.93<br>(25.46 – 34.40) fold increase | D0=0.02098<br>D28=0.0611<br>M18=0.0016<br><br>D0-D28=0.2516<br>D0-M18=0.0331 |
| Median (IQR)                                                                                 | 1.56<br>(1.56 – 1.56) | 130.69<br>(63.06 – 263.66) | 20.63<br>(9.38 – 45.19)  |                                           |                                        | 1.56<br>(1.56 – 1.56) | 148.04<br>(72.13 – 278.13)  | 27.14<br>(12.67 – 57.30) |                                           |                                        |                                                                              |
| MenA vaccine                                                                                 |                       |                            |                          |                                           |                                        |                       |                             |                          |                                           |                                        |                                                                              |

|                                                                                               |                       |                       |                       |                                        |                                        |                       |                       |                       |                                        |                                        |                                                                                     |
|-----------------------------------------------------------------------------------------------|-----------------------|-----------------------|-----------------------|----------------------------------------|----------------------------------------|-----------------------|-----------------------|-----------------------|----------------------------------------|----------------------------------------|-------------------------------------------------------------------------------------|
| Level above lower limit of quantification of the assay – no. of participants/ total no. (%)*  | 9/192<br>(4.69)       | 16/192<br>(8.33)      | 15/181<br>(8.29)      | 2/192<br>(1.04)                        | 4/151<br>(2.65)                        | 16/188<br>(8.51)      | 22/188<br>(11.70)     | 26/177<br>(14.69)     | 4/188<br>(2.13)                        | 2/148<br>(1.35)                        |                                                                                     |
| Geometric mean concentration (95% CI) – EU/ml                                                 | 1.67<br>(1.59 – 1.74) | 1.74<br>(1.64 – 1.85) | 1.79<br>(1.66 – 1.93) | 1.28<br>(0.86 – 1.69)<br>fold increase | 1.30<br>(1.05 – 1.55)<br>fold increase | 1.83<br>(1.68 – 1.98) | 2.01<br>(1.79 – 2.25) | 1.92<br>(1.77 – 2.09) | 2.31<br>(0.95 – 3.66)<br>fold increase | 1.23<br>(1.12 – 1.45)<br>fold increase | D0=0.1243<br>D28=0.2117<br>M18=0.0676<br><br>D0-D28=<br>0.7385<br>D0-M18=<br>0.6716 |
| Median (IQR)                                                                                  | 1.56<br>(1.56 – 1.56) | 1.56<br>(1.56 – 1.56) | 1.56<br>(1.56 – 1.56) |                                        |                                        | 1.56<br>(1.56 – 1.56) | 1.56<br>(1.56 – 1.56) | 1.56<br>(1.56 – 1.56) |                                        |                                        |                                                                                     |
| <b>Anti-Vi IgG Level</b>                                                                      |                       |                       |                       |                                        |                                        |                       |                       |                       |                                        |                                        |                                                                                     |
| TCV                                                                                           |                       |                       |                       |                                        |                                        |                       |                       |                       |                                        |                                        |                                                                                     |
| Level above lower limit of quantification of the assay – no. of participants/ total no. (%)** | 136/450<br>(30.22)    | 372/373<br>(99.73)    | 332/336<br>(98.81)    | 352/356<br>(98.88)                     | 302/314<br>(96.18)                     | 132/399<br>(33.08)    | 336/336<br>(100.00)   | 301/303<br>(99.34)    | 325/327<br>(99.39)                     | 271/287<br>(94.43)                     |                                                                                     |

|                                                                                               |                       |                                |                             |                                           |                                     |                       |                                |                             |                                           |                                     |                                                                                 |
|-----------------------------------------------------------------------------------------------|-----------------------|--------------------------------|-----------------------------|-------------------------------------------|-------------------------------------|-----------------------|--------------------------------|-----------------------------|-------------------------------------------|-------------------------------------|---------------------------------------------------------------------------------|
| Geometric mean concentration (95% CI) – EU/ml                                                 | 7.08<br>(6.39 – 7.83) | 1920.49<br>(1747.09 – 2111.10) | 213.62<br>(188.23 – 242.43) | 482.33<br>(431.03 – 533.63) fold increase | 60.80<br>(52.26 – 69.35)            | 7.37<br>(6.59 – 8.23) | 2176.67<br>(1976.24 – 2397.42) | 276.19<br>(242.30 – 314.82) | 522.04<br>(466.42 – 577.65) fold increase | 74.60<br>(63.31 – 85.89)            | D0=0.5106<br>D28=0.1021<br>M18=0.0080<br><br>D0 – D28=0.3166<br>D0 – M18=0.0305 |
|                                                                                               | 3.7<br>(3.7 – 13.43)  | 2156.67<br>(1269.61 – 3606.48) | 200.32<br>(97.51 – 528.86)  |                                           |                                     | 3.7<br>(3.7 – 13.47)  | 2311.84<br>(1327.70 – 3886.78) | 267.72<br>(123.72 – 670.13) |                                           |                                     |                                                                                 |
| Median (IQR)                                                                                  |                       |                                |                             |                                           |                                     |                       |                                |                             |                                           |                                     |                                                                                 |
| MenA vaccine                                                                                  |                       |                                |                             |                                           |                                     |                       |                                |                             |                                           |                                     |                                                                                 |
| Level above lower limit of quantification of the assay – no. of participants/ total no. (%)** | 62/236<br>(26.27)     | 56/196<br>(28.57)              | 41/181<br>(22.65)           | 3/192<br>(1.56)                           | 4/166<br>(2.41)                     | 60/244<br>(26.79)     | 56/192<br>(29.17)              | 55/177<br>(31.07)           | 5/188<br>(2.66)                           | 6/165<br>(3.64)                     |                                                                                 |
| Geometric mean concentration (95% CI) – EU/ml                                                 | 6.18<br>(5.46 – 6.99) | 6.50<br>(5.58 – 7.57)          | 6.01<br>(5.17 – 6.98)       | 2.56<br>(-0.14 – 5.26) fold increase      | 1.29<br>(0.89 – 1.69) fold increase | 6.82<br>(5.88 – 7.90) | 7.50<br>(6.25 – 9.00)          | 7.19<br>(6.08 – 8.51)       | 8.69<br>(-4.30 – 21.69) fold increase     | 1.76<br>(0.79 – 2.73) fold increase | D0=0.6142<br>D28= 0.5547<br>M18=0.0736<br><br>D0 – D28=0.8198                   |

|              |                        |                     |                    |  |  |                        |                         |                         |  |  |  |                     |
|--------------|------------------------|---------------------|--------------------|--|--|------------------------|-------------------------|-------------------------|--|--|--|---------------------|
|              |                        |                     |                    |  |  |                        |                         |                         |  |  |  | D0 – M18=<br>0.8458 |
| Median (IQR) | 3.7<br>(3.7 –<br>8.53) | 3.7<br>(3.7 – 9.47) | 3.7<br>(3.7 – 3.7) |  |  | 3.7<br>(3.7 –<br>9.41) | 3.7<br>(3.7 –<br>14.12) | 3.7<br>(3.7 –<br>11.91) |  |  |  |                     |

TCV = Typhoid conjugate vaccine. Men A = Group A meningococcal vaccine

† Mann-Whitney U test

\*The lower limit of quantification was 3.125 EU per millilitre. Values below this limit were substituted with 1.56 EU per millilitre for the analysis.

\*\*The lower limit of quantification was 7.4 EU per millilitre. Values below this limit were substituted with 3.7 EU per millilitre for the analysis.

**Table S3. Fever Presentations and Protective Efficacy of Typhoid Conjugate Vaccine (TCV).**

| <b>Outcome</b>                                                                                                | <b>Number of fevers<br/>in TCV group<br/>(N=10005<br/>participants)</b> | <b>Number of fevers<br/>in Men A group<br/>(N=10014<br/>participants)</b> | <b>Vaccine<br/>Efficacy<br/>(95% CI)</b> | <b>P-value</b> |
|---------------------------------------------------------------------------------------------------------------|-------------------------------------------------------------------------|---------------------------------------------------------------------------|------------------------------------------|----------------|
| <b>Fever presentations at clinics/hospital</b>                                                                |                                                                         |                                                                           |                                          |                |
| <b>Number of presentations<br/>with fever of any duration</b>                                                 | 2390                                                                    | 2408                                                                      | 0.7%<br>(-5.1%, 6.2%)                    | 0.8093         |
| <b>Number of fevers of <math>\geq 2</math> days,<br/>or a temperature of 38<br/>degrees C at presentation</b> | 2352                                                                    | 2366                                                                      | 0.5%<br>(-5.3%, 6.1%)                    | 0.8529         |
| <b>Number of fevers of <math>\geq 3</math> days,<br/>or a temperature of 38<br/>degrees C at presentation</b> | 1980                                                                    | 1968                                                                      | -1.1%<br>(-7.7%, 5.0%)                   | 0.7259         |
| <b>Clinically suspected typhoid<br/>at fever presentation<br/>(clinician recorded)</b>                        | 417                                                                     | 415                                                                       | -0.5%<br>(-15.4%, 12.4%)                 | 0.9386         |
| <b>Self-reported fevers from follow up phone calls</b>                                                        |                                                                         |                                                                           |                                          |                |
| <b>Number of self-reported<br/>fevers via phone or follow<br/>up contact</b>                                  | 4816                                                                    | 4766                                                                      | -1.1%<br>(-5.35%, 2.9%)                  | 0.5914         |
| <b>Number of self-reported<br/>fevers that did not result in<br/>visit to health care provider</b>            | 1258                                                                    | 1267                                                                      | 0.6%<br>(-7.5%, 8.2%)                    | 0.8684         |
| <b>Number of self-reported<br/>fevers that resulted in<br/>pharmacy visit</b>                                 | 759                                                                     | 780                                                                       | 2.6%<br>(-7.7%, 12.0%)                   | 0.5998         |

|                                                                                     |                                   |                                  |                         |         |
|-------------------------------------------------------------------------------------|-----------------------------------|----------------------------------|-------------------------|---------|
| <b>Duration of self-reported fever</b>                                              | 4305 fevers<br>3 [2, 4]           | 4287 fevers<br>3 [2, 4]          |                         |         |
| <b>Median days per fever episode [IQR]</b>                                          | N=3915 persons<br>with fever      | N=3922 persons<br>with fever     |                         |         |
| <b><i>Number of days of self-reported fever per person</i></b>                      | N=2886<br>Sum= 15,748<br>4 [2, 7] | N=2863<br>Sum=15,778<br>4 [2, 7] |                         |         |
| <b>Self-reported suspected/confirmed typhoid fevers from phone call follow up</b>   |                                   |                                  |                         |         |
| <b>Number of clinically suspected typhoid fevers - self-reported</b>                | 96                                | 120                              | 19.9%<br>(-5.6%, 39.4%) | 0.1039  |
| <b>Number of clinically diagnosed typhoid fevers - self-reported</b>                | 31                                | 71                               | 56.3%<br>(32.5%, 72.3%) | < 0.001 |
| <b>Duration of self-reported typhoid fever, median days per fever episode [IQR]</b> | 31<br>6 [4,8]                     | 68<br>7.5 [5, 11.5]              |                         | 0.0084  |
| <b><i>Total number of days of self-reported confirmed typhoid fever</i></b>         | 218                               | 624                              |                         |         |

TCV = Typhoid conjugate vaccine. Men A = Group A meningococcal vaccine



**Table S4. Hospitalizations, Absenteeism and Protective Efficacy of Typhoid Conjugate Vaccine (TCV).**

| Outcome                                                                              | TCV<br>(N=10005)        | Men A<br>(N=10014)        | Vaccine Efficacy<br>(95% CI) | p value |
|--------------------------------------------------------------------------------------|-------------------------|---------------------------|------------------------------|---------|
| <b>Hospitalisations</b>                                                              |                         |                           |                              |         |
| Hospitalisation (all cause) [ <i>self-report from phone call follow up</i> ]         | 149                     | 141                       | -5.7%<br>(-34.1%, 16.6%)     | 0.6359  |
| Length of hospital stay (all cause) [ <i>self-report from phone call follow up</i> ] | 138<br>5 [3,7]          | 127<br>5 [3,7]            |                              | 0.3339  |
| Length of hospital stay (all cause) [SAE]                                            | 178<br>4[3,7]           | 194<br>5[3,7]             |                              | 0.2926  |
| Hospitalisation for fever [SAE]                                                      | 148                     | 139                       | -9.1% (-37.7%, 13.6%)        | 0.4517  |
| Hospitalisation for typhoid (suspected or clinical diagnosis) [SAE]                  | 16                      | 18                        | 11.1% (-84.8%, 57.6%)        | 0.7370  |
| Hospitalisation for typhoid (confirmed BC+) [SAEs]                                   | 2                       | 7                         | 71.4% (-50.1%, 97.1%)        | 0.1095  |
| Death (all cause)                                                                    | 3                       | 5                         | 40.0% (-208.6%, 90.6%)       | 0.5083  |
| <b>Days missed from school/work</b>                                                  |                         |                           |                              |         |
| Days of school missed, median number days per person [IQR]                           | N= 1928 pts<br>4 [2, 7] | N=1859<br>pts<br>4 [2, 7] |                              | 0.8283* |
| Days of work missed, median number of days per person [IQR]                          | N=187<br>3 [2, 7]       | N=215<br>4 [2, 7]         |                              | 0.5882* |

|                                              |              |            |         |
|----------------------------------------------|--------------|------------|---------|
| <b>Days missed school for self-</b>          | N=28         | N= 61      | 0.6640* |
| <b>reported <u>typhoid fever</u>, median</b> | 10 [5, 14.5] | 10 [6, 15] |         |
| <b>number days <i>per episode</i> [IQR]</b>  |              |            |         |
| <b>Days missed work for self-</b>            | N=7          | N=14       | 0.4621* |
| <b>reported <u>typhoid fever</u>, median</b> | 6[2,14]      | 7[6,14]    |         |
| <b>number days <i>per episode</i> [IQR]</b>  |              |            |         |

---

TCV = Typhoid conjugate vaccine. Men A = Group A meningococcal vaccine

\*Wilcoxon rank sum test

**Table S5. Causes of Deaths in the Study Cohort**

| <b>Vaccine Arm</b> | <b>Age at enrollment (years)</b> | <b>Time after vaccination (months)</b> | <b>Diagnosis</b>                                                                     |
|--------------------|----------------------------------|----------------------------------------|--------------------------------------------------------------------------------------|
| MenA               | 3.1                              | 7                                      | Multiple organ dysfunction syndrome with severe pneumonia with staphylococcal sepsis |
| MenA               | 8.1                              | 14                                     | Acute kidney injury with pulmonary edema                                             |
| MenA               | 1.3                              | 14                                     | Pneumonia                                                                            |
| MenA               | 13.6                             | 16                                     | Known intestinal malignancy                                                          |
| TCV                | 13.8                             | 16                                     | ? Homicide, details not provided by the family                                       |
| MenA               | 8.1                              | 18                                     | Head injury                                                                          |
| TCV                | 0.8                              | 23                                     | Fall from height                                                                     |
| TCV                | 1.6                              | NA                                     | Suspected death, no information available from family                                |

**Table S6. Antibiotic susceptibility profile for *S. Typhi* isolates**

|                                      | MenA        |                 | TCV         |                 |
|--------------------------------------|-------------|-----------------|-------------|-----------------|
|                                      | Susceptible | Non-susceptible | Susceptible | Non-susceptible |
| <b>Amoxicillin</b>                   | 53 (100%)   |                 | 11 (100%)   |                 |
| <b>Chloramphenicol</b>               | 53 (100%)   |                 | 11 (100%)   |                 |
| <b>Trimethoprim-sulfamethoxazole</b> | 53 (100%)   |                 | 11 (100%)   |                 |
| <b>Ceftriaxone</b>                   | 53 (100%)   |                 | 11 (100%)   |                 |
| <b>Ciprofloxacin</b>                 | 10 (19%)    | 43* (81%)       | 1 (9%)      | 10* (91%)       |
| <b>Azithromycin</b>                  | 52 (98%)    | 1** (2%)        | 10 (91%)    | 1** (9%)        |

\*MIC>0.06mg/L; \*\*MIC>16mg/L

TCV = Typhoid conjugate vaccine. Men A = Group A meningococcal vaccine
